# Supplementary material
Source: PubMed Central journal article supplement (PMC7318043)
Supplement: AAC.02236-19-s0001.pdf [file AAC.02236-19-s0001.pdf]

**Supplemental Table 1: Organisms in cultures removed due to absence of susceptibility results**

| <b>Organism</b>                     | <b>Frequency</b> |
|-------------------------------------|------------------|
| <i>Candida albicans</i>             | 661              |
| <i>Streptococcus</i>                | 404              |
| <i>Candida glabrata</i>             | 261              |
| <i>Citrobacter</i>                  | 245              |
| <i>Escherichia</i>                  | 244              |
| <i>Staphylococcus</i>               | 234              |
| <i>Lactobacillus</i>                | 194              |
| <i>Gardnerella vaginalis</i>        | 165              |
| <i>Enterococcus</i>                 | 160              |
| <i>Klebsiella</i>                   | 149              |
| <i>Enterobacter</i>                 | 147              |
| <i>Yeast</i>                        | 139              |
| <i>Enterococcus species</i>         | 123              |
| <i>Candida tropicalis</i>           | 97               |
| <i>Pseudomonas</i>                  | 77               |
| <i>Candida parapsilosis</i>         | 45               |
| <i>Candida krusei</i>               | 45               |
| <i>Aerococcus species</i>           | 40               |
| <i>Proteus</i>                      | 37               |
| <i>Pseudomonas aeruginosa</i>       | 35               |
| <i>Diphtheroids</i>                 | 34               |
| <i>Escherichia coli</i>             | 30               |
| <i>Candida kefyr</i>                | 18               |
| <i>Enterococcus faecalis</i>        | 18               |
| <i>Candida lusitanae</i>            | 17               |
| Beta hemolytic <i>Streptococcus</i> | 16               |

|                                     |     |
|-------------------------------------|-----|
| <i>Stenotrophomonas maltophilia</i> | 13  |
| <i>Klebsiella pneumoniae</i>        | 13  |
| <i>Candida</i>                      | 11  |
| <i>Corynebacterium</i> species      | 10  |
| Others (Each less than 10):         | 124 |

**Supplemental Table 2: Cohort co-morbidities by antibiotic susceptibility**

|                                     | All            | Cefazolin      |                | Cefepime       |                | Ceftriaxone    |                | Cipro          |                | Pip Tazo       |               |
|-------------------------------------|----------------|----------------|----------------|----------------|----------------|----------------|----------------|----------------|----------------|----------------|---------------|
|                                     |                | S              | R              | S              | R              | S              | R              | S              | R              | S              | R             |
|                                     | n=6366         | n=3100         | n=3265         | n=4110         | n=2249         | n=3575         | n=2741         | n=3064         | n=3300         | n=5219         | n=1144        |
| <b>Hospital visits in past year</b> |                |                |                |                |                |                |                |                |                |                |               |
| Emergency department only           |                |                |                |                |                |                |                |                |                |                |               |
| 0                                   | 5480<br>(86.1) | 2669<br>(48.7) | 2811<br>(51.2) | 3529<br>(64.4) | 1948<br>(35.6) | 3082<br>(56.7) | 2354<br>(43.3) | 2641<br>(48.2) | 2837<br>(51.8) | 4495<br>(82.0) | 984<br>(18.0) |
| 1                                   | 630<br>(9.89)  | 308<br>(48.9)  | 321<br>(51.0)  | 417<br>(66.5)  | 210<br>(33.5)  | 350<br>(56.0)  | 275<br>(44.0)  | 309<br>(49.0)  | 321<br>(51.0)  | 508<br>(88.9)  | 120<br>(19.1) |
| >1                                  | 256<br>(4.04)  | 123<br>(48.1)  | 133<br>(52.0)  | 164<br>(64.3)  | 91<br>(35.7)   | 143<br>(56.1)  | 112<br>(43.9)  | 114<br>(44.5)  | 142<br>(55.5)  | 216<br>(84.4)  | 40<br>(15.6)  |
| ED to inpatient admission           |                |                |                |                |                |                |                |                |                |                |               |
| 0                                   | 4745<br>(74.5) | 2524<br>(53.2) | 2220<br>(46.8) | 3230<br>(68.1) | 1511<br>(31.8) | 2855<br>(60.2) | 1849<br>(39.0) | 2445<br>(51.5) | 2299<br>(48.5) | 4042<br>(85.2) | 701<br>(14.8) |





|                                                           |                 |                 |                 |                 |                 |                 |                 |                 |                 |                 |                 |
|-----------------------------------------------------------|-----------------|-----------------|-----------------|-----------------|-----------------|-----------------|-----------------|-----------------|-----------------|-----------------|-----------------|
| Yes                                                       | 991<br>(15.6)   | 307<br>(31.0)   | 684<br>(69.0)   | 485<br>(49.1)   | 502<br>(50.9)   | 378<br>(38.6)   | 602<br>(61.4)   | 285<br>(28.8)   | 705<br>(71.2)   | 702<br>(70.8)   | 289<br>(29.2)   |
| No                                                        | 5,375<br>(84.4) | 2,793<br>(52.0) | 2,581<br>(48.0) | 3,625<br>(67.5) | 1,747<br>(32.5) | 3,197<br>(59.9) | 2,139<br>(40.1) | 2,779<br>(51.7) | 2,595<br>(48.3) | 4,517<br>(84.1) | 855<br>(15.9)   |
| Cephalosporin                                             |                 |                 |                 |                 |                 |                 |                 |                 |                 |                 |                 |
| Yes                                                       | 1,231<br>(19.3) | 417<br>(33.9)   | 814<br>(66.1)   | 676<br>(55.0)   | 552<br>(45.0)   | 523<br>(42.8)   | 699<br>(57.2)   | 495<br>(40.2)   | 735<br>(59.8)   | 901<br>(73.2)   | 330<br>(26.8)   |
| No                                                        | 5,135<br>(80.7) | 2,683<br>(52.3) | 2,451<br>(47.7) | 3,434<br>(66.9) | 1,697<br>(33.1) | 3,052<br>(59.9) | 2,042<br>(40.1) | 2,569<br>(50.0) | 2,565<br>(50.0) | 4,318<br>(84.1) | 814<br>(15.9)   |
| Penicillin                                                |                 |                 |                 |                 |                 |                 |                 |                 |                 |                 |                 |
| Yes                                                       | 829<br>(13.0)   | 255<br>(30.8)   | 574<br>(69.2)   | 444<br>(53.8)   | 382<br>(46.2)   | 330<br>(40.4)   | 486<br>(59.6)   | 299<br>(36.1)   | 529<br>(63.9)   | 559<br>(67.4)   | 270<br>(32.6)   |
| No                                                        | 5,537<br>(87.0) | 2,845<br>(51.4) | 2,691<br>(48.6) | 3,666<br>(66.3) | 1,867<br>(33.7) | 3,245<br>(59.0) | 2,255<br>(41.0) | 2,765<br>(49.9) | 2,771<br>(50.1) | 4,660<br>(84.2) | 874<br>(15.8)   |
| Carbapenem                                                |                 |                 |                 |                 |                 |                 |                 |                 |                 |                 |                 |
| Yes                                                       | 258<br>(4.1)    | 62<br>(24.0)    | 196<br>(76.0)   | 117<br>(45.7)   | 139<br>(54.3)   | 77<br>(30.1)    | 179<br>(69.9)   | 78<br>(30.4)    | 179<br>(69.6)   | 149<br>(58.0)   | 108<br>(42.0)   |
| No                                                        | 6,108<br>(95.9) | 3,038<br>(49.7) | 3,069<br>(50.3) | 3,993<br>(65.4) | 2,110<br>(34.6) | 3,498<br>(57.7) | 2,562<br>(42.3) | 2,986<br>(48.9) | 3,121<br>(51.1) | 5,070<br>(83.0) | 1,036<br>(17.0) |
| <b>Antimicrobial resistant organisms in past 6 months</b> |                 |                 |                 |                 |                 |                 |                 |                 |                 |                 |                 |
| MDRO                                                      |                 |                 |                 |                 |                 |                 |                 |                 |                 |                 |                 |
| Yes                                                       | 482<br>(7.6)    | 114<br>(23.7)   | 368<br>(76.3)   | 216<br>(45.0)   | 264<br>(55.0)   | 151<br>(31.5)   | 328<br>(68.5)   | 131<br>(27.2)   | 350<br>(72.8)   | 279<br>(58.0)   | 202<br>(42.0)   |
| No                                                        | 5,884<br>(92.4) | 2,986<br>(50.8) | 2,897<br>(49.2) | 3,894<br>(66.2) | 1,985<br>(33.8) | 3,424<br>(58.7) | 2,413<br>(41.3) | 2,933<br>(49.9) | 2,950<br>(50.1) | 4,940<br>(84.0) | 942<br>(16.0)   |
| MRSA                                                      |                 |                 |                 |                 |                 |                 |                 |                 |                 |                 |                 |
| Yes                                                       | 249<br>(3.9)    | 64<br>(25.7)    | 185<br>(74.3)   | 122<br>(49.2)   | 126<br>(50.8)   | 91<br>(36.8)    | 156<br>(63.2)   | 78<br>(31.5)    | 170<br>(68.5)   | 160<br>(64.3)   | 89<br>(35.7)    |

|                                           |                 |                 |                 |                 |                 |                 |                 |                 |                 |                 |                 |
|-------------------------------------------|-----------------|-----------------|-----------------|-----------------|-----------------|-----------------|-----------------|-----------------|-----------------|-----------------|-----------------|
| No                                        | 6,117<br>(96.1) | 3,036<br>(49.6) | 3,080<br>(50.4) | 3,988<br>(65.3) | 2,123<br>(34.7) | 3,484<br>(57.4) | 2,585<br>(42.6) | 2,986<br>(48.8) | 3,130<br>(51.2) | 5,059<br>(82.7) | 1,055<br>(17.3) |
| VRE                                       |                 |                 |                 |                 |                 |                 |                 |                 |                 |                 |                 |
| Yes                                       | 207<br>(3.3)    | 49<br>(23.7)    | 158<br>(76.3)   | 93<br>(44.9)    | 114<br>(55.1)   | 60<br>(29.3)    | 145<br>(70.7)   | 55<br>(26.6)    | 152<br>(73.4)   | 113<br>(54.6)   | 94<br>(45.4)    |
| No                                        | 6,159<br>(96.7) | 3,051<br>(49.5) | 3,107<br>(50.5) | 4,017<br>(65.3) | 2,135<br>(34.7) | 3,515<br>(57.5) | 2,596<br>(42.5) | 3,009<br>(48.9) | 3,148<br>(51.1) | 5,106<br>(82.9) | 1,050<br>(17.1) |
| Cephalosporin-<br>resistant<br>Klebsiella |                 |                 |                 |                 |                 |                 |                 |                 |                 |                 |                 |
| Yes                                       | 38<br>(0.6)     |                 |                 |                 |                 |                 |                 |                 |                 | 11<br>(28.9)    | 27<br>(71.1)    |
| No                                        | 6,328<br>(99.4) |                 |                 |                 |                 |                 |                 |                 |                 | 5,208<br>(82.3) | 1,117<br>(17.7) |
| ESBL                                      |                 |                 |                 |                 |                 |                 |                 |                 |                 |                 |                 |
| Yes                                       | 64<br>(1.0)     | 12<br>(18.8)    | 52<br>(81.2)    | 23<br>(35.9)    | 41<br>(64.1)    | 15<br>(23.4)    | 49<br>(76.6)    |                 |                 | 29<br>(45.3)    | 35<br>(54.7)    |
| No                                        | 6,302<br>(99.0) | 3,088<br>(49.0) | 3,213<br>(51.0) | 4,087<br>(64.9) | 2,208<br>(35.1) | 3,560<br>(56.9) | 2,692<br>(43.1) |                 |                 | 5,190<br>(82.4) | 1,109<br>(17.6) |
| CRE                                       |                 |                 |                 |                 |                 |                 |                 |                 |                 |                 |                 |
| Yes                                       | 16<br>(0.3)     |                 |                 |                 |                 |                 |                 |                 |                 |                 |                 |
| No                                        | 6,350<br>(99.7) |                 |                 |                 |                 |                 |                 |                 |                 |                 |                 |
| MDR<br>Acinetobacter                      |                 |                 |                 |                 |                 |                 |                 |                 |                 |                 |                 |
| Yes                                       | 38<br>(0.6)     |                 |                 | 17<br>(45.9)    | 20<br>(54.1)    | 11<br>(28.9)    | 27<br>(71.1)    | 9<br>(23.7)     | 29<br>(76.3)    | 22<br>(59.5)    | 15<br>(40.5)    |
| No                                        | 6,328<br>(99.4) |                 |                 | 4,093<br>(64.7) | 2,229<br>(35.3) | 3,564<br>(56.8) | 2,714<br>(43.2) | 3055<br>(48.3)  | 3271<br>(51.7)  | 5,197<br>(82.2) | 1,129<br>(17.8) |



|                                        |                 |                 |                 |                 |                 |                 |                 |                 |                 |                 |                 |
|----------------------------------------|-----------------|-----------------|-----------------|-----------------|-----------------|-----------------|-----------------|-----------------|-----------------|-----------------|-----------------|
| Yes                                    | 640<br>(10.1)   | 197<br>(30.8)   | 443<br>(69.2)   | 342<br>(53.7)   | 295<br>(46.3)   | 257<br>(40.5)   | 378<br>(59.5)   | 183<br>(28.6)   | 456<br>(71.4)   | 408<br>(63.9)   | 230<br>(36.1)   |
| No                                     | 5,726<br>(89.9) | 2,903<br>(50.7) | 2,822<br>(49.3) | 3,768<br>(65.9) | 1,954<br>(34.1) | 3,318<br>(58.4) | 2,363<br>(41.6) | 2,881<br>(50.3) | 2,844<br>(49.7) | 4,811<br>(84.0) | 914<br>(16.0)   |
| Quinolone                              |                 |                 |                 |                 |                 |                 |                 |                 |                 |                 |                 |
| Yes                                    | 641<br>(10.1)   | 174<br>(27.1)   | 467<br>(72.9)   | 323<br>(50.6)   | 315<br>(49.4)   | 229<br>(35.9)   | 408<br>(64.1)   | 118<br>(18.4)   | 522<br>(81.6)   | 401<br>(62.8)   | 238<br>(37.2)   |
| No                                     | 5,725<br>(89.9) | 2,926<br>(51.1) | 2,798<br>(48.9) | 3,787<br>(66.2) | 1,934<br>(33.8) | 3,346<br>(58.9) | 2,333<br>(41.1) | 2,946<br>(51.5) | 2,778<br>(48.5) | 4,818<br>(84.2) | 906<br>(15.8)   |
| Cephalosporin                          |                 |                 |                 |                 |                 |                 |                 |                 |                 |                 |                 |
| Yes                                    | 725<br>(11.4)   | 157<br>(21.7)   | 568<br>(78.3)   | 327<br>(45.3)   | 395<br>(54.7)   | 232<br>(32.3)   | 487<br>(67.7)   | 190<br>(26.2)   | 534<br>(73.8)   | 441<br>(61.0)   | 282<br>(39.0)   |
| No                                     | 5,641<br>(88.6) | 2,943<br>(52.2) | 2,697<br>(47.8) | 3,783<br>(67.1) | 1,854<br>(32.9) | 3,343<br>(59.7) | 2,254<br>(40.3) | 2,874<br>(51.0) | 2,766<br>(49.0) | 4,778<br>(84.7) | 862<br>(15.3)   |
| Penicillin                             |                 |                 |                 |                 |                 |                 |                 |                 |                 |                 |                 |
| Yes                                    | 1,288<br>(20.2) | 438<br>(34.0)   | 850<br>(66.0)   | 705<br>(54.9)   | 580<br>(45.1)   | 554<br>(43.4)   | 722<br>(56.6)   | 456<br>(35.4)   | 831<br>(64.6)   | 894<br>(69.5)   | 392<br>(30.5)   |
| No                                     | 5,078<br>(79.8) | 2,662<br>(52.4) | 2,415<br>(47.6) | 3,405<br>(67.1) | 1,669<br>(32.9) | 3,021<br>(59.9) | 2,019<br>(40.1) | 2,608<br>(51.4) | 2,469<br>(48.6) | 4,325<br>(85.2) | 752<br>(14.8)   |
| Carbapenem                             |                 |                 |                 |                 |                 |                 |                 |                 |                 |                 |                 |
| Yes                                    | 89<br>(1.4)     | 11<br>(12.4)    | 78<br>(87.6)    | 33<br>(37.5)    | 55<br>(62.5)    | 17<br>(19.1)    | 72<br>(80.9)    | 19<br>(21.3)    | 70<br>(78.7)    | 43<br>(48.9)    | 45<br>(51.1)    |
| No                                     | 6,277<br>(98.6) | 3,089<br>(49.2) | 3,187<br>(50.8) | 4,077<br>(65.0) | 2,194<br>(35.0) | 3,558<br>(57.1) | 2,669<br>(42.9) | 3,045<br>(48.5) | 3,230<br>(51.5) | 5,176<br>(82.5) | 1,099<br>(17.5) |
| <b>Documented medication allergies</b> |                 |                 |                 |                 |                 |                 |                 |                 |                 |                 |                 |
| Penicillin                             |                 |                 |                 |                 |                 |                 |                 |                 |                 |                 |                 |
| Yes                                    | 1,284<br>(20.2) | 617<br>(48.1)   | 667<br>(51.9)   | 807<br>(62.9)   | 477<br>(37.1)   | 710<br>(56.0)   | 557<br>(44.0)   | 555<br>(43.2)   | 729<br>(56.8)   | 1,065<br>(83.0) | 218<br>(17.0)   |



|                |                 |                 |                 |                 |                 |                 |                 |                 |                 |                 |                 |
|----------------|-----------------|-----------------|-----------------|-----------------|-----------------|-----------------|-----------------|-----------------|-----------------|-----------------|-----------------|
| No             | 5,082<br>(79.8) | 2,483<br>(48.9) | 2,598<br>(51.1) | 3,303<br>(65.1) | 1,772<br>(34.9) | 2,865<br>(56.7) | 2,184<br>(43.3) | 2,509<br>(49.4) | 2,571<br>(50.6) | 4,154<br>(81.8) | 926<br>(18.2)   |
| Carbapenem     |                 |                 |                 |                 |                 |                 |                 |                 |                 |                 |                 |
| Yes            | 21<br>(0.3)     |                 |                 | 11<br>(52.4)    | 10<br>(47.6)    |                 |                 |                 |                 | 11<br>(52.4)    | 10<br>(47.6)    |
| No             | 6,345<br>(99.7) |                 |                 | 4,099<br>(64.7) | 2,239<br>(35.3) |                 |                 |                 |                 | 5,208<br>(82.1) | 1,134<br>(17.9) |
| Quinolone      |                 |                 |                 |                 |                 |                 |                 |                 |                 |                 |                 |
| Yes            | 455<br>(7.1)    | 158<br>(34.7)   | 297<br>(65.3)   | 257<br>(56.6)   | 197<br>(43.4)   | 201<br>(44.5)   | 251<br>(55.5)   | 211<br>(46.4)   | 244<br>(53.6)   | 363<br>(80.0)   | 91<br>(20.0)    |
| No             | 5,911<br>(92.9) | 2,942<br>(49.8) | 2,968<br>(50.2) | 3,853<br>(65.2) | 2,052<br>(34.8) | 3,374<br>(57.5) | 2,490<br>(42.5) | 2,853<br>(48.3) | 3,056<br>(51.7) | 4,856<br>(82.2) | 1,053<br>(17.8) |
| Sulfonamide    |                 |                 |                 |                 |                 |                 |                 |                 |                 |                 |                 |
| Yes            | 869<br>(13.7)   | 389<br>(44.8)   | 480<br>(55.2)   | 550<br>(63.5)   | 316<br>(36.5)   | 471<br>(54.6)   | 391<br>(45.4)   | 394<br>(45.4)   | 474<br>(54.6)   | 716<br>(82.5)   | 152<br>(17.5)   |
| No             | 5,497<br>(86.3) | 2,711<br>(49.3) | 2,785<br>(50.7) | 3,560<br>(64.8) | 1,933<br>(35.2) | 3,104<br>(56.9) | 2,350<br>(43.1) | 2,670<br>(48.6) | 2,826<br>(51.4) | 4,503<br>(81.9) | 992<br>(18.1)   |
| Cephalosporin  |                 |                 |                 |                 |                 |                 |                 |                 |                 |                 |                 |
| Yes            | 325<br>(5.1)    | 130<br>(40.0)   | 195<br>(60.0)   | 196<br>(60.3)   | 129<br>(39.7)   | 159<br>(49.4)   | 163<br>(50.6)   | 126<br>(38.8)   | 199<br>(61.2)   | 253<br>(77.8)   | 72<br>(22.2)    |
| No             | 6,041<br>(94.9) | 2,970<br>(49.2) | 3,070<br>(50.8) | 3,914<br>(64.9) | 2,120<br>(35.1) | 3,416<br>(57.0) | 2,578<br>(43.0) | 2,938<br>(48.7) | 3,101<br>(51.3) | 4,966<br>(82.2) | 1,072<br>(17.8) |
| Glycopeptide   |                 |                 |                 |                 |                 |                 |                 |                 |                 |                 |                 |
| Yes            | 157<br>(2.5)    | 57<br>(36.3)    | 100<br>(63.7)   | 84<br>(53.5)    | 73<br>(46.5)    | 74<br>(47.4)    | 82<br>(52.6)    | 57<br>(36.3)    | 100<br>(63.7)   | 120<br>(76.4)   | 37<br>(23.6)    |
| No             | 6,209<br>(97.5) | 3,043<br>(49.0) | 3,165<br>(51.0) | 4,026<br>(64.9) | 2,176<br>(35.1) | 3,501<br>(56.8) | 2,659<br>(43.2) | 3,007<br>(48.4) | 3,200<br>(51.6) | 5,099<br>(82.2) | 1,107<br>(17.8) |
| Aminoglycoside |                 |                 |                 |                 |                 |                 |                 |                 |                 |                 |                 |
| Yes            | 29<br>(0.5)     |                 |                 | 21<br>(72.4)    | 8<br>(27.6)     | 17<br>(58.6)    | 12<br>(41.4)    | 16<br>(55.2)    | 13<br>(44.8)    |                 |                 |

|               |                 |                 |                 |                 |                 |                 |                 |                 |                 |  |  |
|---------------|-----------------|-----------------|-----------------|-----------------|-----------------|-----------------|-----------------|-----------------|-----------------|--|--|
| No            | 6,337<br>(99.5) |                 |                 | 4,089<br>(64.6) | 2,241<br>(35.4) | 3,558<br>(56.6) | 2,729<br>(43.4) | 3,048<br>(48.1) | 3,287<br>(51.9) |  |  |
| Metronidazole |                 |                 |                 |                 |                 |                 |                 |                 |                 |  |  |
| Yes           | 47<br>(0.7)     | 24<br>(51.1)    | 23<br>(48.9)    | 32<br>(68.1)    | 15<br>(31.9)    | 27<br>(57.4)    | 20<br>(42.6)    | 25<br>(53.2)    | 22<br>(46.8)    |  |  |
| No            | 6,319<br>(99.3) | 3,076<br>(48.7) | 3,242<br>(51.3) | 4,078<br>(64.6) | 2,234<br>(35.4) | 3,548<br>(56.6) | 2,721<br>(43.4) | 3,039<br>(48.1) | 3,278<br>(51.9) |  |  |

\*factors with cells with n<10, that were not included in models are not shown

**Supplemental Table 3: Major Rules used to fill in Unreported Susceptibilities for relevant antibiotics**

| Rule                                                                                                                 | Number of Cells Filled |
|----------------------------------------------------------------------------------------------------------------------|------------------------|
| ceftriaxone resistant implies resistant to cefazolin                                                                 | 2409                   |
| <i>Enterococcaceae</i> are resistant to cefepime                                                                     | 2255                   |
| <i>Enterococcaceae</i> are resistant to ceftriaxone                                                                  | 2255                   |
| <i>Enterococcaceae</i> are resistant to ciprofloxacin                                                                | 2237                   |
| <i>Enterobacteriaceae</i> which are ampicillin + sulbactam sensitive are also sensitive to piperacillin + tazobactam | 2080                   |
| <i>Enterococcaceae</i> which are ampicillin sensitive are also sensitive to piperacillin + tazobactam                | 1780                   |
| cefazolin sensitive implies sensitive to ceftriaxone                                                                 | 1045                   |
| <i>Pseudomonas aeruginosa</i> are resistant to cefazolin                                                             | 665                    |
| <i>Pseudomonas aeruginosa</i> are resistant to ceftriaxone                                                           | 599                    |
| <i>Staphylococcaceae</i> are resistant to ciprofloxacin                                                              | 569                    |
| <i>Enterococcaceae</i> which are ampicillin resistant are also resistant to piperacillin + tazobactam                | 475                    |
| <i>Staphylococcaceae</i> which are cefazolin resistant are also resistant to cefepime                                | 363                    |
| doripenem resistant implies resistant to ceftriaxone                                                                 | 348                    |
| <i>Streptococcaceae</i> are sensitive to piperacillin + tazobactam                                                   | 243                    |
| <i>Streptococcaceae</i> are sensitive to cefazolin                                                                   | 243                    |
| <i>Streptococcaceae</i> are sensitive to cefepime                                                                    | 241                    |
| <i>Streptococcaceae</i> are sensitive to ceftriaxone                                                                 | 241                    |
| <i>Staphylococcus aureus</i> (methicillin resistant) are resistant to beta-lactam                                    | 208                    |

|                                                                                                        |     |
|--------------------------------------------------------------------------------------------------------|-----|
| <i>Enterobacter cloacae</i> are resistant to cefazolin                                                 | 207 |
| <i>Staphylococcus</i> which are nafcillin sensitive are also sensitive to cefepime                     | 204 |
| <i>Staphylococcaceae</i> which are nafcillin resistant are also resistant to beta-lactam               | 201 |
| <i>Citrobacter</i> are resistant to cefazolin                                                          | 148 |
| Group b streptococcus are resistant to ciprofloxacin                                                   | 144 |
| <i>Staphylococcaceae</i> which are cefazolin sensitive are also sensitive to piperacillin + tazobactam | 119 |
| Doripenem resistant implies resistant to ceftriaxone                                                   | 104 |

**Supplemental Table 4: Frequency of Organisms in final dataset**

| <b>Organism</b>                                    | <b>Frequency</b> |
|----------------------------------------------------|------------------|
| <i>Escherichia coli</i>                            | 3515             |
| <i>Enterococcus faecalis</i>                       | 1720             |
| <i>Klebsiella pneumoniae</i>                       | 1209             |
| <i>Pseudomonas aeruginosa</i>                      | 665              |
| <i>Enterococcus faecium</i>                        | 495              |
| <i>Proteus mirabilis</i>                           | 433              |
| <i>Enterobacter cloacae</i>                        | 240              |
| <i>Staphylococcus epidermidis</i>                  | 213              |
| Methicillin resistant <i>Staphylococcus aureus</i> | 208              |
| <i>Klebsiella oxytoca</i>                          | 166              |
| <i>Citrobacter freundii</i>                        | 149              |
| <i>Streptococcus agalactiae</i>                    | 144              |
| <i>Staphylococcus aureus</i>                       | 119              |
| <i>Morganella morganii</i>                         | 109              |
| <i>Aerococcus urinae</i>                           | 96               |

|                                      |     |
|--------------------------------------|-----|
| <i>Enterobacter aerogenes</i>        | 85  |
| <i>Serratia marcescens</i>           | 73  |
| <i>Citrobacter koseri</i>            | 61  |
| <i>Acinetobacter baumannii</i>       | 60  |
| <i>Providencia stuartii</i>          | 49  |
| <i>Stenotrophomonas maltophilia</i>  | 31  |
| <i>Corynebacterium species</i>       | 29  |
| <i>Providencia rettgeri</i>          | 27  |
| <i>Citrobacter amalonaticus</i>      | 16  |
| <i>Enterococcus avium</i>            | 16  |
| <i>Proteus vulgaris</i>              | 16  |
| <i>Pseudomonas fluorescens</i> group | 12  |
| <i>Staphylococcus haemolyticus</i>   | 12  |
| Others (each less than 10)           | 126 |
